# Supplementary material for: Physiological, epigenetic and genetic regulation in some olive cultivars under salt stress
Source: PubMed Central journal article supplement (PMC6355907; doi:10.1038/s41598-018-37496-5), 2019-01-31
Supplement: 41598_2018_37496_MOESM1_ESM.pdf [file 41598_2018_37496_MOESM1_ESM.pdf]

## Supplementary data

# Physiological, epigenetic and genetic regulation in some olive cultivars under salt stress

Soraya Mousavi<sup>1a#</sup>, Luca Regni<sup>1#</sup>, Marika Bocchini<sup>1</sup>, Roberto Mariotti<sup>2</sup>, Nicolò G.M. Cultrera<sup>2</sup>, Stefano Mancuso<sup>3</sup>, Jalaladdin Googlani<sup>3</sup>, Mohammad Reza Chakerolhosseini<sup>4</sup>, Consolación Guerrero<sup>5</sup>, Emidio Albertini<sup>1+</sup>, Luciana Baldoni<sup>2+\*</sup>, Primo Proietti<sup>1+</sup>

<sup>1</sup>Università degli Studi di Perugia, Dept. Agricultural, Food and Environmental Sciences, Perugia, Italy

<sup>2</sup>CNR - Institute of Biosciences and Bioresources, Perugia, Italy

<sup>3</sup>Università degli Studi di Firenze, Dept. Agrifood Production and Environmental Sciences, Florence, Italy

<sup>4</sup>Ferdowsi University of Mashhad, Dept. Soil Science, Mashhad, Iran

<sup>5</sup>Universidad de Malaga, Dept. Molecular Biology and Biochemistry, Malaga, Spain

<sup>a</sup> Present address: CNR - Institute of Biosciences and Bioresources, Perugia, Italy

# These authors contributed equally to this work.

+ These authors contributed equally to this work.

\* Corresponding Author

## E-mail addresses and telephone number:

Soraya Mousavi – [soraya.mousavi@ibbr.cnr.it](mailto:soraya.mousavi@ibbr.cnr.it)

Luca Regni – [regni.luca.agr@gmail.com](mailto:regni.luca.agr@gmail.com)

Marika Bocchini – [marika.bocc87@gmail.com](mailto:marika.bocc87@gmail.com)

Roberto Mariotti – [roberto.mariotti@ibbr.cnr.it](mailto:roberto.mariotti@ibbr.cnr.it)

Nicolò GM Cultrera – [niccolo.cultrera@ibbr.cnr.it](mailto:niccolo.cultrera@ibbr.cnr.it)

Stefano Mancuso – [stefano.mancuso@unifi.it](mailto:stefano.mancuso@unifi.it)

Jalaladdin Googlani - [jalal.goglani@yahoo.com](mailto:jalal.goglani@yahoo.com)

Mohammad Reza Chakerolhosseini – [reza.rns2007@gmail.com](mailto:reza.rns2007@gmail.com)

Consolación Guerrero - [cheloguerreroruiz@gmail.com](mailto:cheloguerreroruiz@gmail.com)

Emidio Albertini – [emidio.albertini@unipg.it](mailto:emidio.albertini@unipg.it)

\*Luciana Baldoni – [luciana.baldoni@ibbr.cnr.it](mailto:luciana.baldoni@ibbr.cnr.it) - +39 328 3760912

Primo Proietti – [primo.proietti@unipg.it](mailto:primo.proietti@unipg.it)

### Supplementary Figure S1; Supplementary Tables S1-S5

**FIG. S1.** Dry weight (DW) of leaves, shoots, stems and roots of cvs. Koroneiki and Royal plants at 0-100-200 mM NaCl, after 43 DAT of hydroponic culture. Data represent the mean value among three plant replicates per variety.

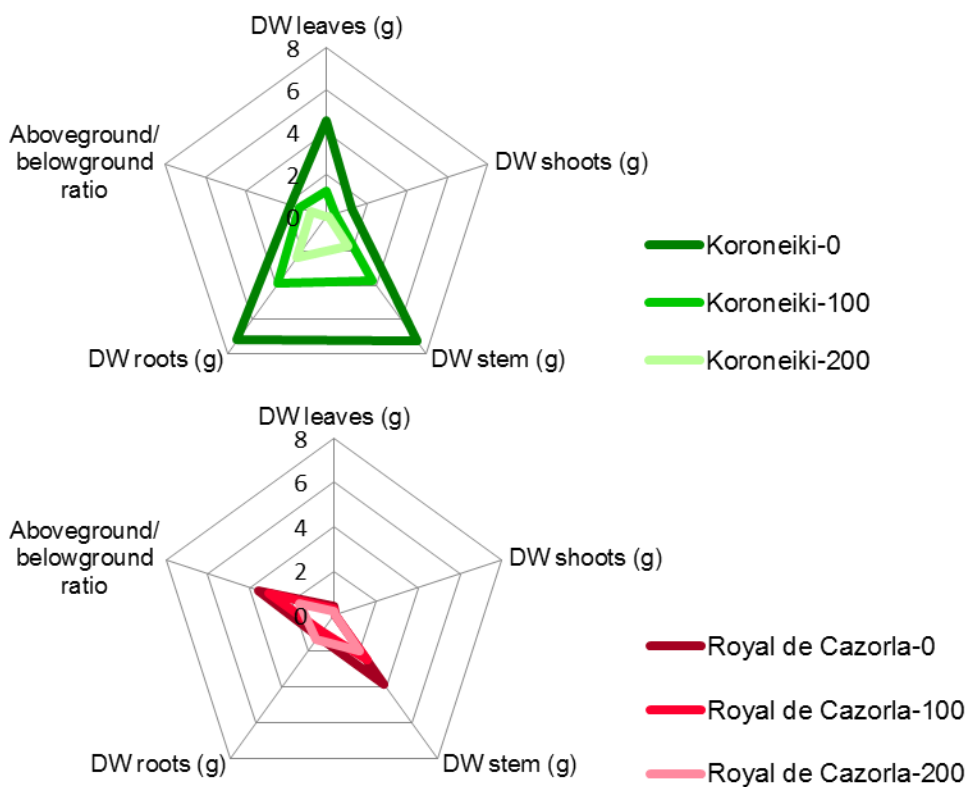

**Table S1.** Adapter and primer sequences used for MSAP.

| <b>Adapter and Primer</b>       | <b><i>EcoRI</i> (5'-3')</b> | <b><i>HpaII</i> / <i>MspI</i> (5'-3')</b> |
|---------------------------------|-----------------------------|-------------------------------------------|
| Adapter 1                       | CTCGTAGACTGCGTACC           | GATCATGAGTCCTGCT                          |
| Adapter 2                       | AATTGGTACGCAGTCTAC          | CGAGCAGGACTCATGA                          |
| Preamplification primer         | GACTGCGTACCAATTC+A          | GATGAGTCTAGAACGG+T                        |
|                                 |                             | HM+TGA                                    |
| Selective amplification primers | E+AGC                       | HM+TCG                                    |
|                                 | E+ACC                       | HM+TAC                                    |
|                                 | E+AGA                       | HM+TGC                                    |
|                                 |                             | HM+TCT                                    |

**Table S2.** Annotated genes in *Olea europaea* genome and olive fruit EST libraries.

| Predicted gene                                                         | Genome Scaffold                                                                                                         | Blastn Gene homolog and species                                                                                                                                                                                                                   | Id%        | E-value Hit score    | DMF position      | Blast                                                                                                                       | Id %                              | E-value Hit Score                                                   |
|------------------------------------------------------------------------|-------------------------------------------------------------------------------------------------------------------------|---------------------------------------------------------------------------------------------------------------------------------------------------------------------------------------------------------------------------------------------------|------------|----------------------|-------------------|-----------------------------------------------------------------------------------------------------------------------------|-----------------------------------|---------------------------------------------------------------------|
| Major Intrinsic Protein, aquaporin family ( <i>OePIP1.1</i> )          | cv. Leccino 51881.1 All. A<br>cv. Leccino 116227.1 All. B<br>cv. Farga Oe5 s00807 All. A<br>cv. Farga Oe5 s00512 All. B | DQ202708.1 <i>Olea europaea</i> plasma membrane intrinsic protein complete mRNA, cds                                                                                                                                                              | 100        | **0.0                | Exon 3 - Intron 3 | OLEEUCI011899:Contig1<br>OLEEUCI011899:Contig4<br>OE5A055758P1<br>OE5A061883P1                                              | 100                               | **0.0                                                               |
| Cytochrome b6f subunit 4, chloroplast ( <i>OePetD</i> )                | cv. Leccino 450256.1                                                                                                    | GU931818.1 <i>Olea europaea</i> cultivar Frantoio chloroplast, complete genome                                                                                                                                                                    | 99         | **0.0                | 39-207 bp         | OLEEUCI009913:Contig3                                                                                                       | 100                               | **0.0                                                               |
| Phosphatidylinositol 4-kinase ( <i>OePI4Kg4</i> )                      | cv. Leccino 20411.1<br>cv. Farga Oe5 s03937                                                                             | XM_012988396.1 <i>Erythranthe guttatus</i> phosphatidylinositol 4-kinase gamma 4, mRNA                                                                                                                                                            | 100        | **0.0                | Exon 1            | OLEEUCI046382:Contig1<br>OLEEUCI055056:Contig1<br>OE5A052040P1                                                              | 100                               | **0.0                                                               |
| Xylose isomerase ( <i>OeXylA</i> )                                     | cv. Leccino 63314.1 ALL A<br>cv. Farga Oe5 s00118 ALL A                                                                 | XM_012975859.1, XM_012975858.1 <i>Erythranthe guttatus</i> xylose isomerase-like, transcript variant X1, X2, partial mRNA                                                                                                                         | 100<br>99  | **0.0<br>**0.0       | Intron 7          | OLEEUCI018232:Contig1<br>OLEEUCI019977:Contig2<br>OLEEUCI019977:Contig3<br>E8NTSAO01BJNXW<br>E8NTSAO01B8SC1<br>OE5A005580P1 | 97<br>90<br>92<br>96<br>100<br>92 | **e-103<br>**7e-047<br>**3e-034<br>**1e-023<br>**2e-019<br>**7e-051 |
| Unknown mitochondrial gene ( <i>OeMit</i> )                            | cv. Leccino 585765.1<br>cv. Leccino 48.1                                                                                | KX545367.1 <i>Hesperelaea palmeri</i> voucher E. Palmer 81 (MO) mitochondrion, complete genome.<br>JN107812.1, <i>Boea hygrometrica</i> mitochondrion, complete genome<br>XP_010111288.1, <i>Morus notabilis</i> hypothetical protein L484_027941 | 100<br>100 | **7e-159<br>**7e-159 | 265-396 bp        | No hits found                                                                                                               | -                                 | **-                                                                 |
| Partial putative Reverse Transcriptase like superfamily, DNA Ty3 gypsy | cv. Leccino 757074.1                                                                                                    | OTG36861.1 <i>Helianthus annuus</i> putative reverse transcriptase domain-containing protein<br>AJ536120.1 <i>Olea europaea</i> partial putative gypsy retrotransposon RNase                                                                      | 100        | **8e-86              | 271-406 bp        | OE5A057157P1                                                                                                                | 92                                | **e-103                                                             |

|                                                                                                                           |                         |                                                                                                     |     |              |               |                              |    |                      |
|---------------------------------------------------------------------------------------------------------------------------|-------------------------|-----------------------------------------------------------------------------------------------------|-----|--------------|---------------|------------------------------|----|----------------------|
| retrotransposon<br>( <i>OeRT1</i> )                                                                                       |                         | gene, and genes encoding<br>retrotranscriptase and integrase,<br>partial_cds                        |     |              |               |                              |    |                      |
| Partial putative<br>Reverse<br>Transcriptase<br>like superfamily,<br>DNA Ty3 gypsy<br>retrotransposon<br>( <i>OeRT2</i> ) | cv. Leccino<br>177987.1 | AJ536120.1 <i>Olea europaea</i> partial<br>putative gypsy retrotransposon RNase                     | 93  | **0.0        |               | E8NTSAO01BIGJN               | 94 | **e-111              |
|                                                                                                                           | cv. Leccino<br>239968.1 | gene, and genes encoding<br>retrotranscriptase and integrase,<br>partial_cds                        | 93  | **0.0        | -             | E8NTSAO01CBCH7               | 94 | **e-111              |
|                                                                                                                           | cv. Leccino<br>229734.1 |                                                                                                     | 93  | **0.0        |               | OE5A057157P1                 | 92 | **2e-043             |
| Partial putative<br>Reverse<br>Transcriptase<br>like superfamily,<br>DNA Ty3 gypsy<br>retrotransposon<br>( <i>OeRT3</i> ) | cv. Leccino<br>327807.1 | OTG36035.1 <i>Helianthus annuus</i> putative<br>reverse transcriptase domain-containing<br>protein. |     |              |               |                              |    |                      |
|                                                                                                                           |                         | AJ536120.1 <i>Olea europaea</i> partial<br>putative gypsy retrotransposon RNase                     | 100 | **2e-<br>173 | 260-373<br>bp | OE5A057157P1<br>OE5A066535P1 | 85 | **2e0-56<br>**2e-019 |

**Table S3.** One-way analysis of variance on the levels of gene expression (ANOVA) performed on all measurements.

| Gene                   | Mean Square    | F       | Prob F     |
|------------------------|----------------|---------|------------|
| <i>OePIP1.1</i> All. A | Data 3,187     | 63,587  | 5,28E-15** |
|                        | Residual 0,050 |         |            |
|                        | Total 1,036    |         |            |
| <i>OePIP1.1</i> All. B | 3,107          | 269,108 | 2,42E-22** |
|                        | 0,012          |         |            |
|                        | 0,984          |         |            |
| <i>OePetD</i>          | 12,931,290     | 608,125 | 1,47E-26** |
|                        | 21,264         |         |            |
|                        | 4,078,701      |         |            |
| <i>OePI4Kg4</i>        | 88,999,550     | 58,131  | 1,47E-14** |
|                        | 1,531,010      |         |            |
|                        | 29,021,120     |         |            |
| <i>OeXylA</i>          | 44,907         | 91,144  | 8,25E-17** |
|                        | 0,493          |         |            |
|                        | 14,451         |         |            |
| <i>OeMit</i>           | 2,321,845      | 320,487 | 3,03E-23** |
|                        | 7,245          |         |            |
|                        | 734,690        |         |            |
| <i>OeRT1</i>           | 5,411,069      | 249,743 | 5,87E-22** |
|                        | 21,667         |         |            |
|                        | 1,715,479      |         |            |
| <i>OeRT2</i>           | 13,918,880     | 83,747  | 2,2E-16**  |
|                        | 166,201        |         |            |
|                        | 4,488,470      |         |            |
| <i>OeRT3</i>           | 3,55E+08       | 56,740  | 1,94E-14** |
|                        | 6,250,830,000  |         |            |
|                        | 1,16E+08       |         |            |

\*\* Significant at  $P \leq 0.01$ .

**Table S4.** Univariate analysis performed by PSP software, considering one dependent variable (qPCR results) and three fixed factors (treatment, cultivar and time).

|                             | Source                      | Type III Sum of Squares | df        | Mean Square | F        | Sig.   |
|-----------------------------|-----------------------------|-------------------------|-----------|-------------|----------|--------|
| OePIP1.1 All A              | Corrected Model             | 3.58                    | 11        | 0.33        | 5.49     | **     |
|                             | Intercept                   | 8.12                    | 1         | 8.12        | 136.95   | **     |
|                             | Treatment                   | 0.17                    | 1         | 0.17        | 2.83     | 0.105  |
|                             | Genotype                    | 1.56                    | 1         | 1.56        | 26.27    | **     |
|                             | Time                        | 1.25                    | 2         | 0.63        | 10.58    | **     |
|                             | Treatment * Genotype        | 0                       | 1         | 0           | 0.06     | 0.816  |
|                             | Treatment * Time            | 0.2                     | 2         | 0.1         | 1.66     | 0.21   |
|                             | Genotype * Time             | 0.4                     | 2         | 0.2         | 3.36     | 0.052  |
|                             | Treatment * Genotype * Time | 0                       | 2         | 0           | 0        | 0.999  |
|                             | Error                       | 1.42                    | 24        | 0.06        |          |        |
|                             | Total                       | 13.12                   | 36        |             |          |        |
|                             | Corrected Total             | 5                       | 35        |             |          |        |
|                             | OePIP1.1 All B              | Corrected Model         | 34.18     | 11          | 3.11     | 269.11 |
| Intercept                   |                             | 12.91                   | 1         | 12.91       | 1117.97  | **     |
| Treatment                   |                             | 0.25                    | 1         | 0.25        | 21.3     | **     |
| Genotype                    |                             | 0.09                    | 1         | 0.09        | 7.9      | *      |
| Time                        |                             | 11.5                    | 2         | 5.75        | 498.01   | **     |
| Treatment * Genotype        |                             | 6.62                    | 1         | 6.62        | 573.08   | **     |
| Treatment * Time            |                             | 0.06                    | 2         | 0.03        | 2.66     | 0.091  |
| Genotype * Time             |                             | 1.28                    | 2         | 0.64        | 55.58    | **     |
| Treatment * Genotype * Time |                             | 14.38                   | 2         | 7.19        | 622.71   | **     |
| Error                       |                             | 0.28                    | 24        | 0.01        |          |        |
| Total                       |                             | 47.37                   | 36        |             |          |        |
| Corrected Total             |                             | 34.46                   | 35        |             |          |        |
| OePetD                      |                             | Corrected Model         | 142244.21 | 11          | 12931.29 | 608.13 |
|                             | Intercept                   | 16792.42                | 1         | 16792.42    | 789.7    | **     |
|                             | Treatment                   | 15205.14                | 1         | 15205.14    | 715.06   | **     |
|                             | Genotype                    | 13617.27                | 1         | 13617.27    | 640.38   | **     |
|                             | Time                        | 24071.25                | 2         | 12035.63    | 566      | **     |
|                             | Treatment * Genotype        | 14583.93                | 1         | 14583.93    | 685.84   | **     |
|                             | Treatment * Time            | 25306.64                | 2         | 12653.32    | 595.05   | **     |
|                             | Genotype * Time             | 25190.63                | 2         | 12595.31    | 592.32   | **     |
|                             | Treatment * Genotype * Time | 24269.34                | 2         | 12134.67    | 570.66   | **     |
|                             | Error                       | 510.34                  | 24        | 21.26       |          |        |
|                             | Total                       | 159546.97               | 36        |             |          |        |
|                             | Corrected Total             | 142754.55               | 35        |             |          |        |
|                             | OePI4Kg4                    | Corrected Model         | 252.18    | 11          | 22.93    | 20.15  |
| Intercept                   |                             | 120.28                  | 1         | 120.28      | 105.72   | **     |
| Treatment                   |                             | 34.89                   | 1         | 34.89       | 30.66    | **     |
| Genotype                    |                             | 1.72                    | 1         | 1.72        | 1.51     | 0.231  |
| Time                        |                             | 66.83                   | 2         | 33.42       | 29.37    | **     |
| Treatment * Genotype        |                             | 3.94                    | 1         | 3.94        | 3.46     | 0.075  |
| Treatment * Time            |                             | 30.96                   | 2         | 15.48       | 13.61    | **     |

|        |                             |           |    |          |         |       |
|--------|-----------------------------|-----------|----|----------|---------|-------|
|        | Genotype * Time             | 47.63     | 2  | 23.81    | 20.93   | **    |
|        | Treatment * Genotype * Time | 66.21     | 2  | 33.1     | 29.09   | **    |
|        | Error                       | 27.31     | 24 | 1.14     |         |       |
|        | Total                       | 399.77    | 36 |          |         |       |
|        | Corrected Total             | 279.49    | 35 |          |         |       |
| OeXyla | Corrected Model             | 493.97    | 11 | 44.91    | 91.14   | **    |
|        | Intercept                   | 704.06    | 1  | 704.06   | 1428.98 | **    |
|        | Treatment                   | 79.52     | 1  | 79.52    | 161.4   | **    |
|        | Genotype                    | 30.12     | 1  | 30.12    | 61.13   | **    |
|        | Time                        | 54.14     | 2  | 27.07    | 54.94   | **    |
|        | Treatment * Genotype        | 6.12      | 1  | 6.12     | 12.42   | *     |
|        | Treatment * Time            | 64.95     | 2  | 32.47    | 65.91   | **    |
|        | Genotype * Time             | 42.47     | 2  | 21.23    | 43.1    | **    |
|        | Treatment * Genotype * Time | 216.66    | 2  | 108.33   | 219.87  | **    |
|        | Error                       | 11.82     | 24 | 0.49     |         |       |
|        | Total                       | 1209.86   | 36 |          |         |       |
|        | Corrected Total             | 505.8     | 35 |          |         |       |
| OeMit  | Corrected Model             | 25540.29  | 11 | 2321.84  | 320.49  | **    |
|        | Intercept                   | 7096.21   | 1  | 7096.21  | 979.5   | **    |
|        | Treatment                   | 50.26     | 1  | 50.26    | 6.94    | 0.015 |
|        | Genotype                    | 3943.18   | 1  | 3943.18  | 544.28  | **    |
|        | Time                        | 2740.73   | 2  | 1370.36  | 189.15  | **    |
|        | Treatment * Genotype        | 503.28    | 1  | 503.28   | 69.47   | **    |
|        | Treatment * Time            | 9264      | 2  | 4632     | 639.36  | **    |
|        | Genotype * Time             | 2603.19   | 2  | 1301.59  | 179.66  | **    |
|        | Treatment * Genotype * Time | 6435.65   | 2  | 3217.83  | 444.16  | **    |
|        | Error                       | 173.87    | 24 | 7.24     |         |       |
|        | Total                       | 32810.37  | 36 |          |         |       |
|        | Corrected Total             | 25714.16  | 35 |          |         |       |
| OeRT1  | Corrected Model             | 153107.63 | 11 | 13918.88 | 83.75   | **    |
|        | Intercept                   | 31276.64  | 1  | 31276.64 | 188.19  | **    |
|        | Treatment                   | 20221.4   | 1  | 20221.4  | 121.67  | **    |
|        | Genotype                    | 25606.66  | 1  | 25606.66 | 154.07  | **    |
|        | Time                        | 20737.38  | 2  | 10368.69 | 62.39   | **    |
|        | Treatment * Genotype        | 16264.9   | 1  | 16264.9  | 97.86   | **    |
|        | Treatment * Time            | 23369.32  | 2  | 11684.66 | 70.3    | **    |
|        | Genotype * Time             | 21131.45  | 2  | 10565.72 | 63.57   | **    |
|        | Treatment * Genotype * Time | 25776.53  | 2  | 12888.27 | 77.55   | **    |
|        | Error                       | 3988.83   | 24 | 166.2    |         |       |
|        | Total                       | 188373.1  | 36 |          |         |       |
|        | Corrected Total             | 157096.46 | 35 |          |         |       |
| OeRT2  | Corrected Model             | 59521.76  | 11 | 5411.07  | 249.74  | **    |
|        | Intercept                   | 16790.1   | 1  | 16790.1  | 774.93  | **    |
|        | Treatment                   | 391.31    | 1  | 391.31   | 18.06   | **    |
|        | Genotype                    | 14318.21  | 1  | 14318.21 | 660.84  | **    |
|        | Time                        | 21192.83  | 2  | 10596.42 | 489.07  | **    |
|        | Treatment * Genotype        | 134.38    | 1  | 134.38   | 6.2     | 0.02  |



|       |                             |             |    |             |        |     |
|-------|-----------------------------|-------------|----|-------------|--------|-----|
|       | Treatment * Time            | 517.61      | 2  | 258.8       | 11.94  | **  |
|       | Genotype * Time             | 22857.37    | 2  | 11428.68    | 527.48 | **  |
|       | Treatment * Genotype * Time | 110.05      | 2  | 55.02       | 2.54   | 0.1 |
|       | Error                       | 520         | 24 | 21.67       |        |     |
|       | Total                       | 76831.85    | 36 |             |        |     |
|       | Corrected Total             | 60041.76    | 35 |             |        |     |
| OeRT3 | Corrected Model             | 3901371485  | 11 | 354670135   | 56.74  | **  |
|       | Intercept                   | 370995447.9 | 1  | 370995447.9 | 59.35  | **  |
|       | Treatment                   | 368253974.2 | 1  | 368253974.2 | 58.91  | **  |
|       | Genotype                    | 341704105.1 | 1  | 341704105.1 | 54.67  | **  |
|       | Time                        | 709807000.6 | 2  | 354903500.3 | 56.78  | **  |
|       | Treatment * Genotype        | 344277695.4 | 1  | 344277695.4 | 55.08  | **  |
|       | Treatment * Time            | 704853030   | 2  | 352426515   | 56.38  | **  |
|       | Genotype * Time             | 713710942.2 | 2  | 356855471.1 | 57.09  | **  |
|       | Treatment * Genotype * Time | 718764737.1 | 2  | 359382368.6 | 57.49  | **  |
|       | Error                       | 150019913.9 | 24 | 6250829.74  |        |     |
|       | Total                       | 4422386846  | 36 |             |        |     |
|       | Corrected Total             | 4051391398  | 35 |             |        |     |

\* significant value < 0.01; \*\* <0.001

**Table S5.** Specific primers used to amplify methylated fragments for quantitative expression of seven candidate transcripts.

| <b>Gene</b>     | <b>Primers for RT-qPCR</b>   | <b>Nucleotide sequence of primers (5' – 3')</b> |
|-----------------|------------------------------|-------------------------------------------------|
| <i>OePIP1</i>   | qRT- <i>OePIP1ALL.A</i> -For | GCTTTTCGAGCCGGGTGAG                             |
|                 | qRT- <i>OePIP1ALL.A</i> -Rev | GGCACTTGGAATCAGACTTG                            |
|                 | qRT- <i>OePIP1ALL.B</i> -For | ACTTTTCGAGCCGGGTGAG                             |
|                 | qRT- <i>OePIP1ALL.B</i> -Rev | TGCACTTGGAATCAGACTTA                            |
| <i>OePetD</i>   | qRT- <i>OePetD</i> -For      | AGAGCTAAATTGGCTAAAGGTATGG                       |
|                 | qRT- <i>OePetD</i> -Rev      | CTACATTACATGCAATAGTACCTAG                       |
| <i>OePI4Kg4</i> | qRT- <i>OePI4Kg4</i> -For    | TCCATACATGGATTTGAATTTGTC                        |
|                 | qRT- <i>OePI4Kg4</i> -Rev    | GCAAGAAAGAGTGGGAATACACAAG                       |
| <i>OeXylA</i>   | qRT- <i>OeXylA</i> -For      | CACACTATCTAGGTGGAGAAAATATG                      |
|                 | qRT- <i>OeXylA</i> -Rev      | ACCATATGATTAAGCTCTCTTTCCAT                      |
| <i>OeMit</i>    | qRT- <i>OeMit</i> -For       | CCTTGCTTGAAGCTTGCATT                            |
|                 | qRT- <i>OeMit</i> -Rev       | TGATTCCTTCCTTGGTTTGG                            |
| <i>OeRT</i>     | qRT- <i>OeRT1</i> -For       | GGAGATAATTAGATTAACCATCAAG                       |
|                 | qRT- <i>OeRT2</i> -For       | GGAGATAAATCGATTAACCATCAAG                       |
|                 | qRT- <i>OeRT3</i> -For       | AGTTAAAGAAGCAGCTGCAAGAA                         |
|                 | qRT- <i>OeRT1,2</i> -Rev     | TTGGAAAATACCTTAGCTTCTTTTCAG                     |
|                 | qRT- <i>OeRT3</i> -Rev       | GATGCACATCCTCATGCTTT                            |
